# Supplementary material for: Urothermal synthesis of mononuclear lanthanide compounds: slow magnetization relaxation observed in Dy analogue
Source: Royal Society of Chemistry journal article supplement (doi:10.1039/c3ce41762j), 2013-10-22
Supplement: c3ce41762j.pdf [file c3ce41762j.pdf]

Supporting Information

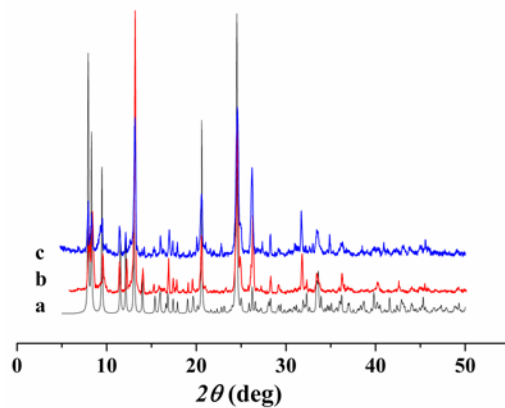

**Fig. S1** The powder X-ray diffraction patterns: (a) the simulated one based on the X-ray single crystal data and the experimental patterns of compound Dy(1) (b) and Tb(2) (c) .

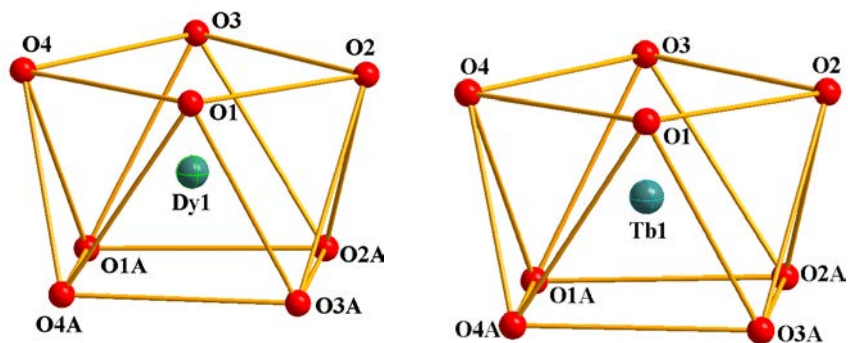

**Fig. S2** The square-antiprismatic coordination of the Dy1 and Tb1 ions in Dy(1) and Tb(2) .

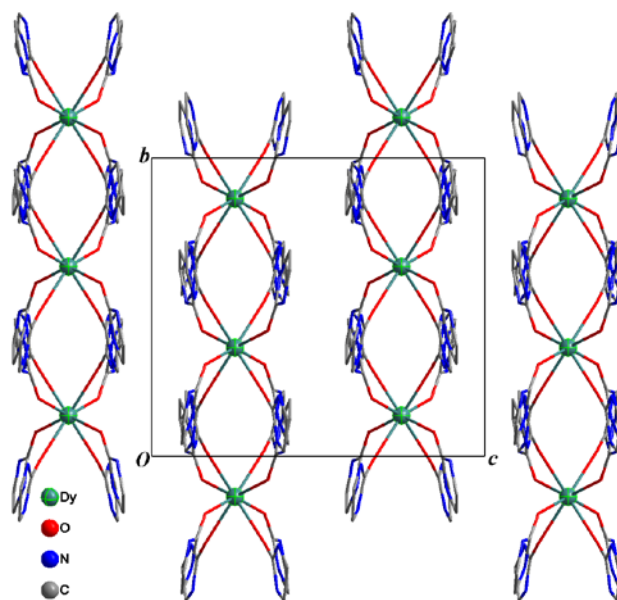

Fig. S3 View of the packing arrangement along the crystallographic a-axis for Dy(1).

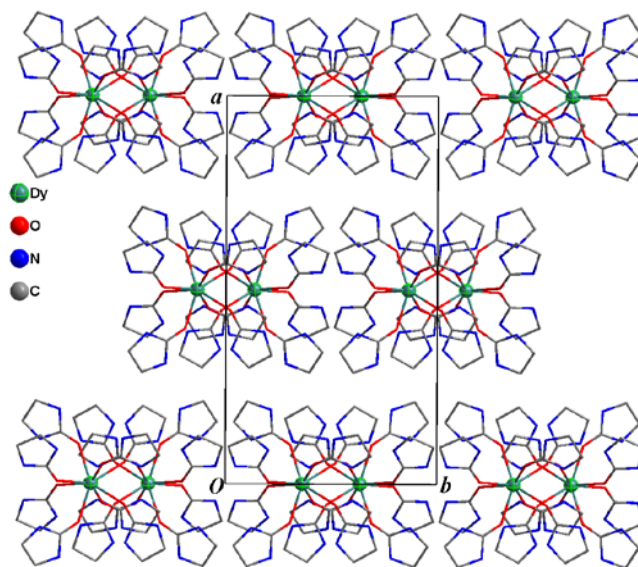

Fig. S4 View of the packing arrangement along the crystallographic c-axis for Dy(1).

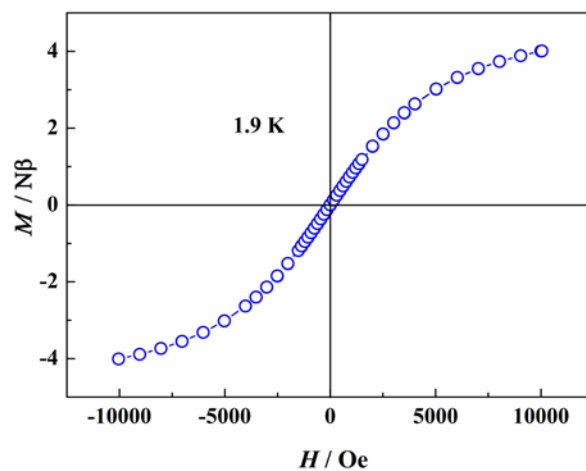

Fig. S5 Field dependence of the magnetization of Dy(1) measured at 1.9 K.

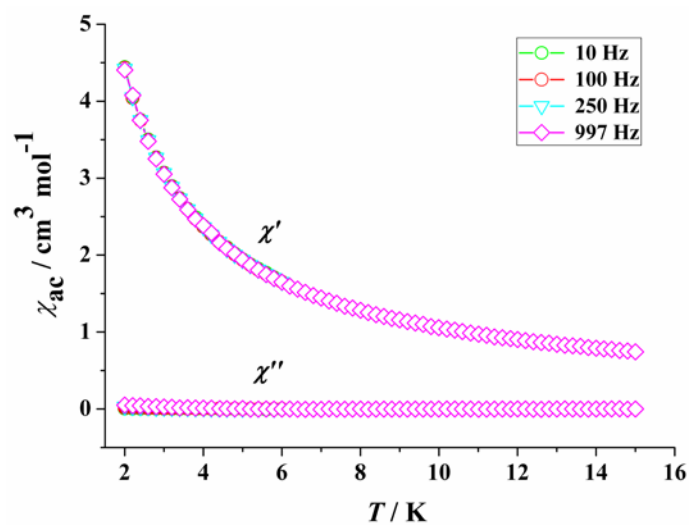

Fig. S6 Temperature dependence of the in-phase (top) and out-of phase (bottom) ac susceptibility signals under zero dc field for Dy(1).

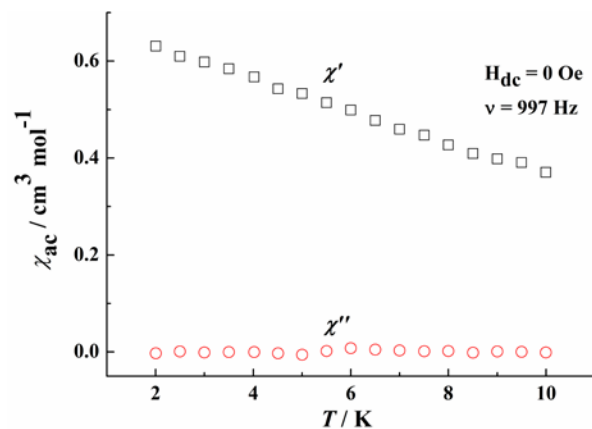

Fig. S7 Temperature dependence of the in-phase and out-of phase ac susceptibility signals under zero dc field for Tb(2).

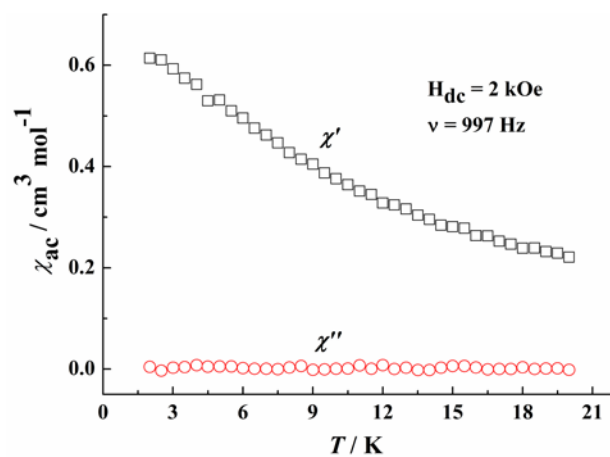

Fig. S8 Temperature dependence of the in-phase and out-of phase ac susceptibility signals under 2 kOe dc field for Tb(2).

Table S1. Selected Bond Angles (°) of **1** and **2**.<sup>a</sup>

| Compound Dy( <b>1</b> ) |            | Compound Tb( <b>1</b> ) |            |
|-------------------------|------------|-------------------------|------------|
| O(3A)–Dy(1)–O(4)        | 138.55(8)  | O(3A)–Tb(1)–O(4)        | 138.39(7)  |
| O(3)–Dy(1)–O(4)         | 73.59(8)   | O(3)–Tb(1)–O(4)         | 73.63(7)   |
| O(3A)–Dy(1)–O(3)        | 146.10(11) | O(3A)–Tb(1)–O(3)        | 146.23(11) |
| O(4)–Dy(1)–O(4A)        | 73.57(12)  | O(4)–Tb(1)–O(4A)        | 73.39(11)  |
| O(3A)–Dy(1)–O(1)        | 74.90(8)   | O(3A)–Tb(1)–O(1)        | 74.81(8)   |
| O(3)–Dy(1)–O(1)         | 115.30(9)  | O(3)–Tb(1)–O(1)         | 115.46(8)  |
| O(4)–Dy(1)–O(1)         | 74.56(8)   | O(4)–Tb(1)–O(1)         | 74.46(8)   |
| O(4A)–Dy(1)–O(1)        | 78.91(9)   | O(4A)–Tb(1)–O(1)        | 78.73(8)   |
| O(1)–Dy(1)–O(1A)        | 146.73(12) | O(1)–Tb(1)–O(1A)        | 146.42(11) |
| O(3A)–Dy(1)–O(2A)       | 74.82(8)   | O(3A)–Tb(1)–O(2A)       | 74.80(7)   |
| O(3)–Dy(1)–O(2A)        | 77.94(8)   | O(3)–Tb(1)–O(2A)        | 77.98(8)   |
| O(4)–Dy(1)–O(2A)        | 144.57(8)  | O(4)–Tb(1)–O(2A)        | 144.79(7)  |
| O(4A)–Dy(1)–O(2A)       | 118.60(9)  | O(4A)–Tb(1)–O(2A)       | 118.80(8)  |
| O(1)–Dy(1)–O(2A)        | 138.12(8)  | O(1)–Tb(1)–O(2A)        | 138.00(7)  |
| O(1A)–Dy(1)–O(2A)       | 73.61(8)   | O(1A)–Tb(1)–O(2A)       | 74.03(8)   |
| O(2A)–Dy(1)–O(2)        | 72.29(11)  | O(2A)–Tb(1)–O(2)        | 71.82(11)  |

<sup>a</sup> Compounds **1** and **2**, A:  $-x$ ,  $y$ ,  $-z+1/2$ .

Table S2. Geometrical parameters of hydrogen bonds for **1** and **2**.<sup>a</sup>

| D–H···A                   | D–H (Å) | H···A (Å) | D···A (Å)  | <DHA (°) |
|---------------------------|---------|-----------|------------|----------|
| <b>Compound Dy(1)</b>     |         |           |            |          |
| N1–H1A···O4               | 0.860   | 2.179     | 2.878(4)   | 138.13   |
| N2–H2A···O9               | 0.860   | 2.219     | 3.003 (11) | 151.45   |
| N3–H3A···O1               | 0.860   | 2.189     | 2.879 (4)  | 137.07   |
| N4–H4A···O6 <sup>#1</sup> | 0.860   | 2.195     | 3.013(10)  | 158.73   |
| N5–H5A···O2               | 0.860   | 2.182     | 2.882(4)   | 138.25   |
| N6–H6A···O8 <sup>#1</sup> | 0.860   | 2.216     | 2.940 (11) | 141.72   |
| N7–H7A···O3               | 0.860   | 2.261     | 2.930(4)   | 134.64   |
| N8–H8A···O5 <sup>#2</sup> | 0.860   | 2.269     | 2.830(9)   | 122.95   |
| <b>Compound Tb(2)</b>     |         |           |            |          |
| N1–H1A···O4               | 0.860   | 2.174     | 2.872 (4)  | 138.06   |
| N2–H2A···O9               | 0.860   | 2.219     | 2.999 (12) | 150.77   |
| N3–H3A···O1               | 0.860   | 2.198     | 2.888 (4)  | 137.12   |
| N4–H4A···O6               | 0.860   | 2.193     | 3.006(10)  | 157.71   |
| N5–H5A···O2               | 0.860   | 2.183     | 2.880 (4)  | 137.93   |
| N6–H6A···O8 <sup>#1</sup> | 0.860   | 2.230     | 2.950 (11) | 141.24   |
| N7–H7A···O3               | 0.860   | 2.263     | 2.934 (4)  | 134.89   |
| N8–H8A···O5 <sup>#2</sup> | 0.860   | 2.278     | 2.837(9)   | 122.80   |

<sup>a</sup> Compounds **1** and **2**: #1 –  $x, y, -z + 1/2$ ; #2  $x, y + 1, z$ .

5

10

15
